# Supplementary material for: Near-infrared light-triggered drug release from UV-responsive diblock copolymer-coated upconversion nanoparticles with high monodispersity
Source: Royal Society of Chemistry journal article supplement (doi:10.1039/c8tb00651b), 2018-01-01
Supplement: c8tb00651b1.pdf [file c8tb00651b1.pdf]

## Supporting Information

### Near-infrared light-triggered drug release from UV-responsive diblock copolymer-coated upconversion nanoparticles with high monodispersity

Jun Xiang,<sup>a</sup> Xia Tong,<sup>a</sup> Feng Shi,<sup>b</sup> Qiang Yan,<sup>c</sup> Bing Yu<sup>a</sup> and Yue Zhao<sup>\*,a</sup>

#### 1. Synthetic route

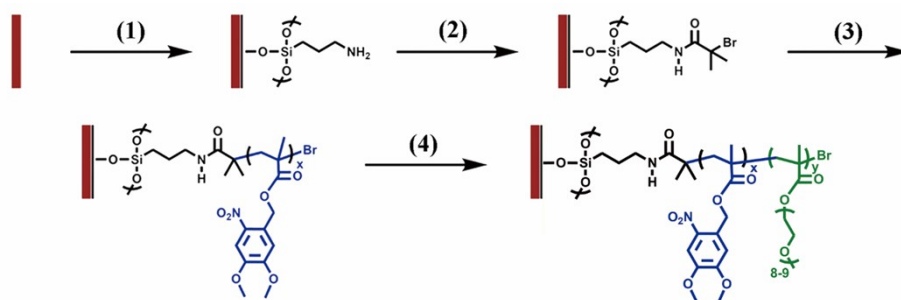

**Figure S1.** Surface modification of UCNP through a bottom-up strategy: (1) silica layer coating, (2) immobilization of ATRP initiators, (3) growth of hydrophobic block that is a UV-responsive polymer (PNB), and (4) growth of hydrophilic block (POEG). The UCNP and thin silica layers are depicted as red and black rods, respectively.

#### 2. TEM images

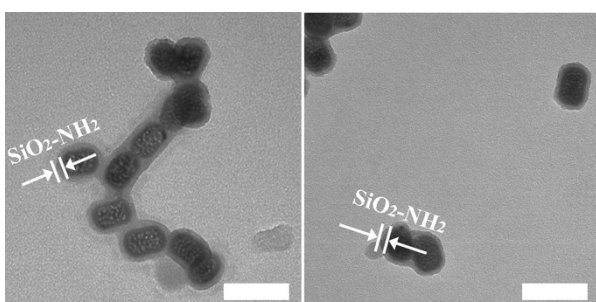

**Figure S2.** TEM images for UCNP-NH<sub>2</sub>. Scale bar is 60 nm.

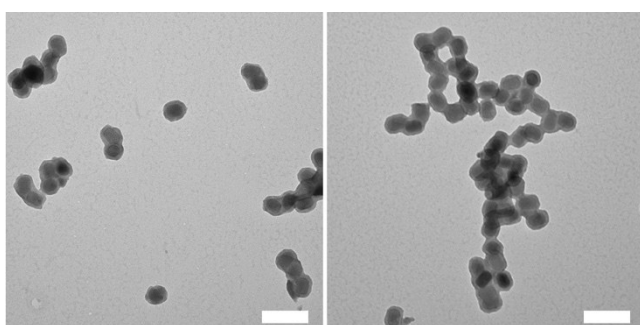

**Figure S3.** TEM image of UCNP-Br. Scale bar is 100 nm.

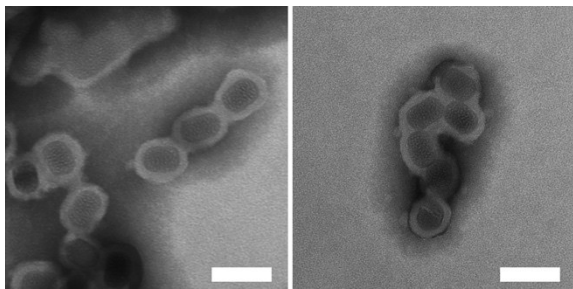

**Figure S4.** TEM images of UCNP@PNB. Scale bar is 60 nm.

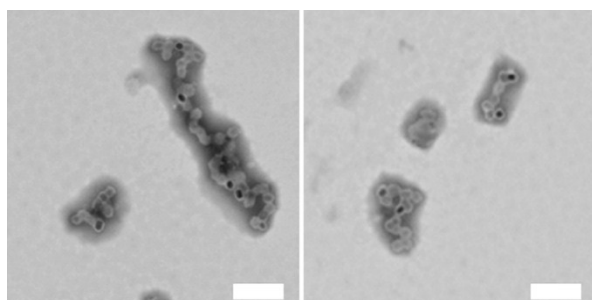

**Figure S5.** TEM images of UCNP@PNB-*b*-POEG. Scale bar is 200 nm.

### 3. TGA analysis

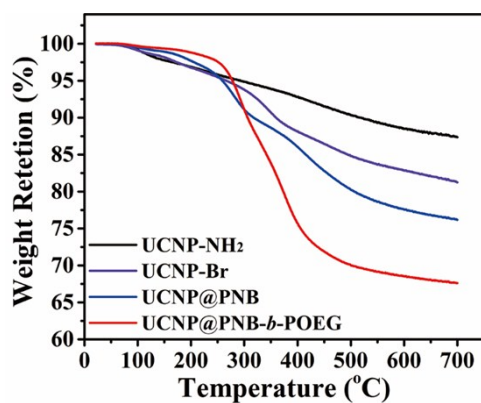

**Figure S6.** TGA analysis of UCNP-NH<sub>2</sub>, UCNP-Br, UCNP@PNB and UCNP@PNB-*b*-POEG.

### 4. SEC

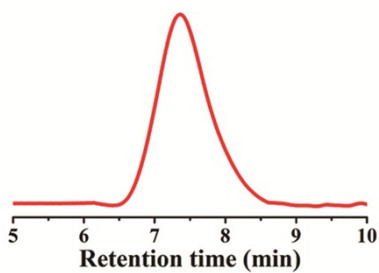

**Figure S7.** SEC curve of PNB-*b*-POEG cleaved by HF etching of UCNP-*b*-POEG.

## 5. Calculations

**Table S1.** Basic information of nanoparticles.

|                                                                                                                                                                              |                                                                               |                            |
|------------------------------------------------------------------------------------------------------------------------------------------------------------------------------|-------------------------------------------------------------------------------|----------------------------|
| <b>Mass of NPs at room temperature:</b>                                                                                                                                      |                                                                               |                            |
| <b>1. assuming the residual mass of all NPs is 10 mg at 700 °C.</b>                                                                                                          |                                                                               |                            |
| <b>2. equation to calculate the mass of NPs at room temperature: mass = (10 mg) / (the wt.% of NPs at 700 °C).</b>                                                           |                                                                               |                            |
| mass of UCNP-NH <sub>2</sub> at room temperature (mg)                                                                                                                        | = 10/0.874                                                                    | = 11.44                    |
| mass of UCNP-Br at room temperature (mg)                                                                                                                                     | = 10/0.813                                                                    | = 12.30                    |
| mass of UCNP@PNB- <i>b</i> -POEG at room temperature (mg)                                                                                                                    | = 10/0.676                                                                    | = 14.79                    |
| <b>Mole weight of organic species in NPs (MWO, g/mol)</b>                                                                                                                    |                                                                               |                            |
| MWO in UCNP-NH <sub>2</sub> (g/mol)                                                                                                                                          | -(CH <sub>2</sub> ) <sub>3</sub> -NH <sub>2</sub>                             | = 58                       |
| MWO in UCNP-Br (g/mol)                                                                                                                                                       | -(CH <sub>2</sub> ) <sub>3</sub> -NH-C=O-C(CH <sub>3</sub> ) <sub>2</sub> -Br | = 207                      |
| MWO in UCNP@PNB- <i>b</i> -POEG                                                                                                                                              | -PNB- <i>b</i> -POEG                                                          | = 1.09 × 10 <sup>4</sup>   |
| <b>UCNP and UCNP-Br:</b>                                                                                                                                                     |                                                                               |                            |
| <b>1. the shape of the UCNP is approximated to be a cylinder and the density of NaYF<sub>4</sub>:Yb,Tm@NaYF<sub>4</sub> is taken to be the same as for NaYF<sub>4</sub>.</b> |                                                                               |                            |
| <b>2. the shape of the UCNP-Br is approximated to be a cylinder and the thickness of silica-Br layer is 6 nm.</b>                                                            |                                                                               |                            |
| <b>3. assuming the density of silica is 2.1 g/m<sup>3</sup> <sup>a</sup> and the density of silica-Br is taken to be the same as for silica.</b>                             |                                                                               |                            |
| density of UCNP (g/cm <sup>3</sup> ) <sup>b</sup>                                                                                                                            |                                                                               | = 4.31                     |
| length of UCNP (nm)                                                                                                                                                          |                                                                               | = 34.7                     |
| width of UCNP (nm)                                                                                                                                                           |                                                                               | = 22.1                     |
| volume of one UCNP (nm <sup>3</sup> ) using $v = \pi r^2 h$                                                                                                                  | = 3.14 × (22.1/2) <sup>2</sup> × 34.7                                         | = 1.33 × 10 <sup>4</sup>   |
| mass of one UCNP (mg)                                                                                                                                                        | = 4.31 × 10 <sup>-18</sup> × 1.33 × 10 <sup>4</sup>                           | = 5.73 × 10 <sup>-14</sup> |
| surface area of one UCNP (nm <sup>2</sup> ) using $s = 2\pi r^2 + 2\pi r h$                                                                                                  | = 2 × 3.14 × (22.1/2) <sup>2</sup> + 2 × 3.14 × (22.1/2) × 34.7               | = 3.20 × 10 <sup>3</sup>   |
| length of UCNP-Br (nm)                                                                                                                                                       |                                                                               | = 47                       |
| width of UCNP-Br (nm)                                                                                                                                                        |                                                                               | = 34                       |
| volume of one UCNP-Br (nm <sup>3</sup> ) using $v = \pi r^2 h$                                                                                                               | = 3.14 × (34/2) <sup>2</sup> × 47                                             | = 4.26 × 10 <sup>4</sup>   |
| surface area of one UCNP-Br (nm <sup>2</sup> ) using $s = 2\pi r^2 + 2\pi r h$                                                                                               | = 2 × 3.14 × (34/2) <sup>2</sup> + 2 × 3.14 × (34/2) × 47                     | = 6.8 × 10 <sup>3</sup>    |
| volume of silica-Br (nm <sup>3</sup> )                                                                                                                                       | = 4.26 × 10 <sup>4</sup> - 1.33 × 10 <sup>4</sup>                             | = 2.93 × 10 <sup>4</sup>   |

|                                              |                                                                                       |                          |
|----------------------------------------------|---------------------------------------------------------------------------------------|--------------------------|
| <b>density of UCNP-Br (g/cm<sup>3</sup>)</b> | $= (4.31 \times 1.33 \times 10^4 + 2.1 \times 2.93 \times 10^4) / (4.26 \times 10^4)$ | $= 2.79$                 |
| <b>mass of one UCNP-Br (mg)</b>              | $= 2.79 \times 10^{-18} \times 4.26 \times 10^4$                                      | $= 1.19 \times 10^{-13}$ |
| <b>Number of NPs (10 mg NPs at 700 °C)</b>   | $= (10) / (1.19 \times 10^{-13})$                                                     | $= 8.41 \times 10^{13}$  |
| <b>Mole of NPs (10 mg NPs at 700 °C)</b>     | $= (8.41 \times 10^{13}) / (6.02 \times 10^{23})$                                     | $= 1.40 \times 10^{-10}$ |

<sup>a</sup> This value was obtained from *J. Eng. Thermophys-Rus.*, **2016**, 25, 174.

<sup>b</sup> This value was obtained from *Nat. Commun.*, **2015**, 6, 6938.

**Table S2.** Useful information from TGA analysis.

| <b>Mass loss at different temperature regions</b> | <b>UCNP-NH<sub>2</sub> (mg)</b> | <b>UCNP-Br (mg)</b>             | <b>UCNP@PNB-<i>b</i>-POEG (mg)</b> |
|---------------------------------------------------|---------------------------------|---------------------------------|------------------------------------|
| <b>T&lt;80 °C</b>                                 | 0.039                           | 0.052                           | 0.014                              |
| <b>80 °C&lt;T&lt;150 °C</b>                       | 0.0217                          | 0.175                           | 0.081                              |
| <b>250 °C&lt;T&lt;450 °C</b>                      | 0.492                           | 1.11                            | 3.80                               |
| <b>Mass of organic species (mg)</b>               | $= 0.492$                       | $= (1.11 - 0.492)$<br>$= 0.618$ | $= (3.80 - 1.11)$<br>$= 2.69$      |
| <b>Mole of organic species (mmol)<sup>a</sup></b> | $= 8.5 \times 10^{-3}$          | $= 4.2 \times 10^{-3}$          | $= 2.5 \times 10^{-4}$             |
| <b>Number of organic species (N)<sup>b</sup></b>  | $= 5.12 \times 10^{18}$         | $= 2.47 \times 10^{18}$         | $= 1.51 \times 10^{17}$            |

<sup>a</sup> Mole of organic species = (mass of organic species) / (MWO), MWO is from **Table S1**.

<sup>b</sup>  $N = N_A \times$  mole of organic species,  $N_A$  is Avogadro constant.

Based on the values from **Table S1** and **S2**, the grafting densities of initiator and polymer can be obtained by the equation below:

$$\text{Grafting density} = (\text{number of organic species}) / (\text{surface area of one UCNP-Br} \times \text{number of NPs})$$

Therefore, the initiator and polymer grafting densities are approximately 4.4 (or 0.34 mmol/g) and 0.26 chains/nm<sup>2</sup>, respectively.

In addition, the initiation efficiency of initiators can be calculated by the following equation:

$$\text{Initiation efficiency} = (\text{grafting density of polymer}) / (\text{grafting density of initiator})$$

Hence, the initiation efficiency is around 6%.

## 6. Upconversion emission spectra

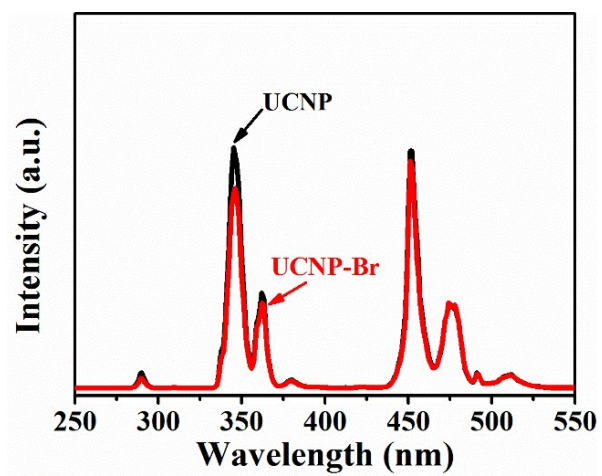

**Figure S8.** The emission spectra of the neat UCNPs (black) in hexane and UCNPs-Br (red) in DMF.
